# Supplementary material
Source: Frontiers journal article supplement (https://www.frontiersin.org/articles/501316)
Supplement: Table_1.pdf [file Table_1.pdf]

## **SUPPLEMENTARY MATERIAL**

### **Validation of two Short Personality Inventories using Self-descriptions in Natural Language and Quantitative Semantics Test Theory**

Danilo Garcia<sup>1, 2, 3\*</sup>, Patricia Rosenberg<sup>1</sup>, Ali Al Nima<sup>1, 2</sup>, Alexandre Granjard<sup>1, 2</sup>, Kevin M.

Cloninger<sup>1, 4</sup>, Sverker Sikström<sup>4\*</sup>

<sup>1</sup>Blekinge Center of Competence, Region Blekinge, Karlskrona, Sweden

<sup>2</sup>Department of Psychology, University of Gothenburg, Gothenburg, Sweden

<sup>3</sup>Department of Behavioral Science and Learning, Linköping University, Linköping, Sweden

<sup>4</sup>Anthropedia Foundation, St. Louis, Missouri, USA

<sup>5</sup>Department of Psychology, Lund University, Lund, Sweden

\*Correspondence concerning this article should be addressed to D. Garcia, [danilo.garcia@icloud.com](mailto:danilo.garcia@icloud.com), or S. Sikström, [sverker.sikstrom@psy.lu.se](mailto:sverker.sikstrom@psy.lu.se).

Table S1. Frequency of significant words in Study 1

| Self-descriptive word | Frequency |
|-----------------------|-----------|
| caring                | 320       |
| loving                | 257       |
| kind                  | 251       |
| happy                 | 180       |
| quiet                 | 157       |
| outgoing              | 150       |
| shy                   | 123       |
| strong                | 116       |
| compassionate         | 89        |
| reserved              | 77        |
| introverted           | 72        |
| anxious               | 63        |
| lazy                  | 38        |
| mean                  | 11        |

Note. The table lists the number of times that the significant words have been produced by the participants in Study 1, and that were produced at least ten times.

Table S2. Frequency of significant words in Study 2

| Self-descriptive word | Frequency |
|-----------------------|-----------|
| Caring                | 774       |
| kind                  | 618       |
| loving                | 590       |
| happy                 | 435       |
| quiet                 | 379       |
| fun                   | 377       |
| outgoing              | 346       |
| shy                   | 315       |
| strong                | 248       |
| compassionate         | 220       |
| introverted           | 168       |
| warm                  | 156       |
| anxious               | 144       |
| sarcastic             | 139       |
| lazy                  | 100       |
| leader                | 47        |
| charming              | 43        |
| brave                 | 42        |
| cool                  | 38        |
| charismatic           | 35        |
| angry                 | 33        |
| mean                  | 25        |
| aggressive            | 22        |
| sexy                  | 17        |
| arrogant              | 13        |
| careing               | 11        |

Note. The table lists the number of times that the significant words have been produced by the participants in Study

2, and that were produced at least ten times.
